# Supplementary material for: Resting Heart Rate and Cardiovascular Outcomes during Intensive and Standard Blood Pressure Reduction: An Analysis from SPRINT Trial
Source: MDPI journal article supplement (doi:10.3390/jcm10153264), 2021-07-24
Supplement: s1 [file s1]

**The results of the analysis with threshold value RHR = 80 b.p.m in all SPRINT participants and in subjects with prior cardiovascular disease.**

After the adjustment for age, sex, race, baseline and in-trial SBP and DBP, BMI, GFR, cholesterol, glucose concentration, current smoking status in subjects allocated to standard treatment group, RHR > 80 b.p.m. was associated with increased by 9% risk (hazard ratio 1.09 with 95% CI 0.77–1.52) in comparison to subjects with RHR < 80 b.p.m. In subjects allocated to intensive treatment arm RHR > 80 b.p.m. was associated with increased by 31% risk (hazard ratio 1.31 with 95% CI 0.88–1.93) in comparison to subjects with RHR < 80 b.p.m.

When the effect of intensive lowering of SBP was compared in subjects with baseline HR $\geq$ 80 b.p.m. (hazard ratio 0.79 with 95% CI 0.51–1.24,  $p = 0.311$ ) versus subjects with baseline HR<80 b.p.m., (hazard ratio 0.75 with 95% CI 0.62–0.89,  $p = 0.002$ ), no evidence was found for interaction for intensive SBP lowering and baseline HR for primary endpoint event ( $p$  for interaction 0.819).

*Subanalysis in subjects with the history of CVD*

When effect of intensive lowering of SBP was compared in subjects with baseline HR  $\geq$  80 b.p.m. (hazard ratio 0.92 with 95% CI 0.37–2.27,  $p = 0.86$ ) versus subjects with baseline HR < 80 b.p.m., (hazard ratio 0.82 with 95% CI 0.62–1.09,  $p = 0.18$ ), no evidence was found for interaction for intensive SBP lowering and baseline HR for primary endpoint event ( $p$  for interaction 0.81).
